# Supplementary material for: Prevalence of comorbidity in Chinese patients with COVID-19: systematic review and meta-analysis of risk factors
Source: BMC Infect Dis. 2021 Feb 22;21:200. doi: 10.1186/s12879-021-05915-0 (PMC7897883; doi:10.1186/s12879-021-05915-0)
Supplement: Supplementary file 2 — Additional file 2. Primary data extracted from included studies and sorted based on different comorbidities, computational process of u-test and the result pages of begg’s test and egger’s test in Stata15. [file 12879_2021_5915_MOESM2_ESM.xlsx]

## Sheet: title page
Prevalence of comorbidity in Chinese patients with COVID-19: systematic review and meta-analysis of risk factors
	Tingxuan Yin1, Yuanjun Li2, Ying Ying2, Zhijun Luo1,2, *
	1 Queen Mary School, Nanchang University, Nanchang, Jiangxi, China
	2 Jiangxi Province Key Laboratory of Tumor Pathogenesis and Molecular Pathology and Department of Pathophysiology, School of Basic Medical Sciences, Nanchang University, Nanchang, Jiangxi, China
	Corresponding author: Zhijun Luo*, Queen Mary School, Nanchang University, 461 Ba Yi Avenue, Nanchang, Jiangxi, Post Code 33006, China. Email: zluo559914@ncu.edu.cn

## Sheet: total characteristics
		Baseline characteristics of identified studies and meta-analysis in COVID-19
		study	region	date	number (n,%)					age	symptoms %				comorbidity (n,%)
					All	male	female	non-severe	severe		Fever	Cough	Myalgia	Dyspnea	All	non-severe	severe
1	463	Cheng Kebin	Wuhan Jinyintan Hospital, Hubei, China	01.01-02.06	463	244	219	282	181	51(43,60)	90	77	13	42	45	25	20
2	79	Fang Xiaowei	Anhui Provincial Hospital, Hefei, China	01.22-02.18	79	45(56)	34(43)	55(69)	24(30)	45.1±16.6	85	57	34	11	27(34)	11(20)	16(66)
3	80	Li dan	Zhuzhou Central Hospital, Hunan	01.20-02.27	80	40	40	63	17	47.5(3-90)	73.8	71	27.5	23.8	22	NA	NA
4	83	Li Kunhua	The Second Affiliated Hospital of Chongqing Medical University (Chongqing, China)	01.01-02.29	83	44(53)	39(46)	58(69)	25(30)	45.5±12.3	87	78	18	11	15(18)	4(6)	11(44)
5	55	Sun Lijun	Beijing 302 Hospital, Beijing, China	01.20-02.15	55	31(56)	24(43.6)	40	15	44(34-56)	81.8	47.3	18.2	9.1	21(23)	9(15)	12(40)
6	143	Xiao Kaihu	Chongqing University Three Gorges Hospital, Chongqing, China	01.23-02.08	143	73(51)	70(48)	107(74)	36(25)	45.1±1.0	67	53	26	18	46(32)	29(27)	17(47)
7	223	Yuan Jing	Affiliated Public health hospital of southwest university, Chongqing, China	01.24-02.23	223	105(47)	118(53)	192(86)	31(14)	46.5±16.1	53	51	5	5	54(24)	40(21)	14(45)
8	221	Zhang Guqin	Zhongnan Hospital of Wuhan University, Hubei, China	01.02-02.10	221	108(48)	113(51)	166	55	55.0(39.0–66.5)	90.5	61	NA	29	78(35)	40(24)	38(69）
9	140	Zhang Jin-jin	No. 7 Hospital of Wuhan, Hubei, China	01.10-02.03	140	69(49)	71(51)	82(59)	58(41)	57(25-87)	92	75	75	37	90(64)	44(54)	46(80)
10	189	Zhao Cancan	The First Affiliated Hospital of Bengbu Medical College, Anhui, China	01.24-02.17	189	91	98	153	36	46.5±16.6	97	98	20	11	205	114	91
11	91	Zhao Xin-Ying	Jingzhou Central Hospital, Hubei, China	01.16-02.10	91	49(54)	42(46)	61	30	46	64.8	82	16.5	NA	18(33)	10(25)	8(53)
12	99	Zheng Yongli	Chengdu Public Health Clinical Medical Center, Sichuan, China	01.16-02.20	99	51	48	67	32	49.40±18.45	86	85	12	35	41	18（27）	23（72）
13	134	Siqin Zhang	Guizhou Provincial Staff Hospital, Guizhou, China	02.15-03.31	134	69	65	115	19	33.0 (21.8–46.3)	N/A	N/A	N/A	N/A	25	13	12
14	276	Yiping Wei	Suizhou Zengdu Hospital, Hubei, China	01.27-03.11	276	155	121	262	14	51.0 (41.0–58.0)	277	218	26	42	68	56	12		1.00362	0.789855	0.0942029	0.152174
15	1280	Huilin Fang	Wuhan Third Hospital, Hubei, China	01.27-03.15	1280	615	655	793	487	63 (51–70)	865	863	75	81	600	300	300		0.675781	0.674219	0.0585938	0.0632812
16	412	Yang Xiuhong	Wuhan NO.1 Hospital, Hubei,China	02.12-03.07	412	183	229	111	301	60.2±14.2	258	220	96	55	229	69	160		0.626214	0.533981	0.23301	0.133495
17	103	Ren Meixin	Beijing Youan Hospital, Beijing, china	01.21-03.31	103	45	58	71	32	N/A	N/A	N/A	N/A	N/A	41	19	22
18	92	Wang Ling	Huangshi Central Hospital, Hubei, China	01.23-03.01	92	42	50	71	21	50.05±16.19	64	53	1	N/A	32	N/A	N/A		0.695652	0.576087	0.0108696
19	66	Yao Chunyong	Yicheng People’s Hospital, Hubei, China	01.16-02.09	66	N/A	N/A	55	11	21-71	56	47	N/A	N/A	N/A	N/A	N/A		0.848485	0.712121
20	58	Lv Yaodong	Nanning Fourth People's Hospital, Guangxi, China	01.23-03.02	58	29	29	44	14	55 (3m-90yr)	29	33	21	10	26	15	11		0.5	0.568966	0.362069	0.172414
21	77	Cheng Fang	Wenzhou Central Hospital, Zhejiang, China	01.15-02.29	77	43	34	50	27	46(63) M(QR)	69	54	6	23	N/A	N/A	N/A		0.896104	0.701299	0.0779221	0.298701
22	788	Shan-Yan Zhang	Multiple hospitals in ZheJiang Province, China	01.17-02.12	788	407	381	710	78	N/A	636	506	91	N/A	218	171	47		0.807107	0.642132	0.115482
23	409	Zhengtong Lv	Jiangan Fangcang shelter hospital, Wuhan, China	02.01-03.31	409	188	221	361	48	50.47±12.43	391	304	64	N/A	N/A	N/A	N/A		0.95599	0.743276	0.156479
24	564	Zhichao Feng	The whole Hunan province, China	01.17-02.28	564	284	280	495	69	47 (36, 58)	357	323	25	26	132	95	37		0.632979	0.572695	0.0443262	0.0460993
25	172	Chen Zhao	Union Hospital, Tongji Medical College, Huazhong University of Science and Technology,Wuhan, Hubei, China	02.13-02.25	172	82	90	112	60	65 (57, 71)	109	95	38	N/A	95	57	38		0.633721	0.552326	0.22093
26	232	Lingshuang Sheng	Tongji Hospital of Tongji Medical College of Huazhong University of Science and Technology,Wuhan, Hubei, China	N/A	232	N/A	N/A	102	130	68 (58–90)	N/A	N/A	N/A	N/A	133	36	97
27	671	Yifei Nie	279 hospitals in Henan Province	01.23-02.5	655	367	288	583	72	43±15.09	N/A	N/A	N/A	N/A	N/A	N/A	N/A
28	1168	Sheng-long Chen	32 hospitals in Guangdong Province	01.14-03.16	1168	560	608	1020	148	43.5 (32–57)	807	575	93	78	245	172	73		0.690925	0.492295	0.0796233	0.0667808
29	456	B. Cheng	The Central Hospital of Wuhan, Tongji Medical College, Huazhong University of Science and Technology, Wuhan, Hubei, China	01.01-03.20	456	211	245	205	251	54.97±18.59	297	241	153	102	N/A	N/A	N/A		0.651316	0.528509	0.335526	0.223684
30	625	Songqiao Liu	24 hospitals in Jiangsu province, China	01.10-03.15	625	329	296	561	64	44.44±17.19	412	344	N/A	N/A	N/A	N/A	N/A		0.6592	0.5504
31	333	XiaoYu	The Center for disease control and prevention in ShangHai	01.24-02.19	333	161	172	307	26	50 (35, 63)	273	137	26	4	107	91	16		0.81982	0.411411	0.0780781	0.012012
32	365	Yanpei Zhang	the People’s Hospital of Honghu, Hubei, China & the First Affiliated Hospital of Nanchang University, Jiangxi, China	01.01-03.18	365	176	189	339	26	46.8±15.5	221	194	1	13	N/A	N/A	N/A		0.605479	0.531507	0.00273973	0.0356164
33	1007	Yuan Cen	Huoshenshan Hospital & General Hospital of the central theater Command of the people's Liberation Army & Mobile cabin hospitals in Wuhan, Hubei, China	N/A	1007	493	514	720	287	61(49-68)	753	653	24	363	364	195	169		0.747766	0.648461	0.0238332	0.360477
34	663	Jixiang Zhang	Renmin Hospital of Wuhan University (Wuhan, China)	01.11-02.06	663	321	342	254	409	55.6 (44, 69)	527	410	63	161	N/A	N/A	N/A		0.794872	0.618401	0.0950226	0.242836
35	41	Qing Zhang	First Hospital of Jilin University and Infectious Diseases Hospital in Changchun City, Jilin, China	01.23-02.25	41	23	18	33	8	45 (31, 53)	32	29	3	8	N/A	N/A	N/A		0.780488	0.707317	0.0731707	0.195122
36	56	Jing-Bo Wang	Sixth People’s Hospital of Shenyang, Liaoning, China	01.24-02.17	56	24	32	45	11	45.0 (21-80)	42	34	6	15	26	18	8		0.75	0.607143	0.107143	0.267857
37	78	Nannan Zhang	Jining Infectious Disease Hospital, Jining City, Shandong, China	01.24-03.01	78	60	18	72	6	43.82±15.91	63	36	4	8	N/A	N/A	N/A		0.807692	0.461538	0.0512821	0.102564
38	108	Qingchun Yao	Dabieshan Medical Center, Huanggang city, Hubei, China	01.30-03.11	108	43	65	83	25	52 (37–58)	80	84	28	15	25	12	13		0.740741	0.777778	0.259259	0.138889
39	293	Zixin Shu	Hubei Provincial Hospital of Traditional Chinese Medicine, Hubei, China	01.15-03.02	293	135	158	207	86	57.1±15.6	102	148	N/A	N/A	178	108	70		0.348123	0.505119
40	64	Huihuang Huang	Fifth Medical Center of Chinese PLA General Hospital, Beijing, China	01.13-03.10	64	37	27	43	21	47.8±18.5	N/A	N/A	N/A	N/A	N/A	N/A	N/A
41	85	Chang-Zheng Wang	Xiangyang No.1 People’s Hospital, Hubei University of Medicine, Xiangyang, Hubei Province	01.10-02.28	85	45	40	39	46	59.4±15.3	76	65	36	8	N/A	N/A	N/A		0.894118	0.764706	0.423529	0.0941176
				TOTAL	12526

## Sheet: hypertension
		hypertension		severe		non-severe
		1	Chaolin Huang	2	5	4	8
		2	XIANG Tianxin	4	6	2	8
		3	CHEN Min	17	24	1	3
		4	FANG Xiaowei	11	16	5	11
		5	XIONG Juan	10	27	16	39
		6	Dawei Wang	21	26	22	38
		7	XIAO Kaihu	5	17	5	29
		8	Kunhua Li	2	11	3	4
		9	Jin-jin Zhang	22		20	82
		10	Yuan Jing	4		21	192
								HUbei：1	non-HUbei：2
	final version	hypertension		severe		non-severe		sub-analysis		comorbidities	total cases
463	Cheng Kebin	9	Cheng Kebin	53	181	54	282	Hubei		107	463
79	Fang Xiaowei	8	Fang Xiaowei	11	24	5	55	non-Hubei		16	79
80	Li dan	7	Li dan	7	17	7	63	non-Hubei		14	80
83	Li Kunhua	5	Li Kunhua	2	25	3	58	non-Hubei		5	83
55	Sun Lijun	10	Sun Lijun	6	15	2	40	non-Hubei		8	55
143	Xiao Kaihu	12	Xiao Kaihu	5	36	12	107	non-Hubei		17	143
223	Yuan Jing	16	Yuan Jing	4	31	21	192	non-Hubei		25	223
221	Zhang Guqin		Zhang Guqin	26	55	28	166	Hubei		54	221
140	Zhang Jin-jin		Zhang Jin-jin	22	58	20	82	Hubei		42	140
189	Zhao Cancan		Zhao Cancan	11	36	11	153	non-Hubei		22	189
91	Zhao Xin-Ying		Zhao Xin-Ying	9	30	9	61	Hubei		18	91
134	Siqin Zhang	134	Siqin Zhang	7	19	7	115	non-Hubei		14	134
276	Yiping Wei	276	Yiping Wei	8	14	39	262	Hubei		47	276
1280	Huilin Fang	1280	Huilin Fang	216	487	207	793	Hubei		423	1280
412	杨秀红	412	Yang Xiuhong	105	301	18	111	Hubei		123	412
103	任美欣	103	Ren Meixin	19	32	11	71	non-Hubei		30	103
92	王玲	92	Wang Ling	11	21	9	71	Hubei		20	92
66	姚春勇	66	Yao Chunyong	3	11	12	55	Hubei		15	66
58	吕耀东	58	Lv Yaodong	3	14	6	44	non-Hubei		9	58
77	程芳	77	Cheng Fang	15	27	10	50	non-Hubei		25	77
788	Shan-Yan Zhang	788	Shan-Yan Zhang	34	78	92	710	non-Hubei		126	788
409	Zhengtong Lv	275	Yaping Wang	23	48	102	361	Hubei		125	409
564	Zhichao Feng	409	Zhengtong Lv	21	69	61	495	non-Hubei		82	564
172	Chen Zhao	564	Zhichao Feng	25	60	38	112	Hubei		63	172
232	Lingshuang Sheng	172	Chen Zhao	17	130	32	102	Hubei		49	232
671	Yifei Nie	232	Lingshuang Sheng	5	72	55	583	non-Hubei		60	655
1168	Sheng-long Chen	671	Yifei Nie	36	148	74	1020	non-Hubei		110	1168
456	B. Cheng	1168	Sheng-long Chen	102	251	48	205	Hubei		150	456
625	Songqiao Liu	456	B. Cheng	19	64	72	561	non-Hubei		91	625
333	XiaoYu	625	Songqiao Liu	9	26	55	307	non-Hubei		64	333
365	Yanpei Zhang	333	XiaoYu	6	26	33	339	non-Hubei		39	365
1007	Yuan Cen	365	Yanpei Zhang	125	287	145	720	Hubei		270	1007
41	Qing Zhang	41	Qing Zhang	2	8	1	33	non-Hubei		3	41
56	Jing-Bo Wang	56	Jing-Bo Wang	0	11	9	45	non-Hubei		9	56
78	Nannan Zhang	78	Nannan Zhang	1	6	3	72	non-Hubei		4	78
108	Qingchun Yao	108	Qingchun Yao	9	25	7	83	Hubei		16	108
293	Zixin Shu	293	Zixin Shu	29	86	40	207	Hubei		69	293
64	Huihuang Huang	64	Huihuang Huang	9	21	5	43	non-Hubei		14	64
85	Chang-Zheng Wang	85	Chang-Zheng Wang	16	46	6	39	Hubei		22	85
			39								11764

## Sheet: diabetes
		Diabetes	severe		non-severe
	1	Chaolin Huang	1	5	7	8
	2	XIANG Tianxin	2	6	0	8
	3	CHEN Min	4	24	0	3
	4	FANG Xiaowei	4	16	4	11
	5	XIONG Juan	6	27	8	39
	6	Dawei Wang	8	26	6	38
	7	XIAO Kaihu	5	17	5	29
	8	Kunhua Li	7	11	0	4
	9	Jin-jin Zhang	8		9
	10	Yuan Jing	8		10
	final version	Diabetes	severe		non-severe		comorbidities	total cases
	9	Cheng Kebin	20	181	20	282	40	463	Hubei
	8	Fang Xiaowei	4	24	4	55	8	79	non-Hubei
	7	Li dan	6	17	4	63	10	80	non-Hubei
	5	Li Kunhua	7	25	0	58	7	83	non-Hubei
	10	Sun Lijun	2	15	3	40	5	55	non-Hubei
		Xiao Kaihu	5	36	5	107	10	143	non-Hubei
		Yuan Jing	8	31	10	192	18	223	non-Hubei
		Zhang Guqin	7	55	15	166	22	221	Hubei
		Zhang Jin-jin	8	58	9	82	17	140	Hubei
		Zhao Cancan	10	36	6	153	16	189	non-Hubei
		Zhao Xin-Ying	1	30	2	61	3	91	Hubei
		Zheng Yongli	3	32	3	67	6	99	non-Hubei
134	134	Siqin Zhang	6	19	4	115	10	134	non-Hubei
276	276	Yiping Wei	2	14	12	262	14	276	Hubei
1280	1280	Huilin Fang	93	487	91	793	184	1280	Hubei
412	412	Yang Xiuhong	43	301	5	111	48	412	Hubei
103	103	Ren Meixin	3	32	5	71	8	103	non-Hubei
92	92	Wang Ling	5	21	3	71	8	92	Hubei
66	66	Yao Chunyong	1	11	3	55	4	66	Hubei
58	58	Lv Yaodong	3	14	3	44	6	58	non-Hubei
77	77	Cheng Fang	2	27	4	50	6	77	non-Hubei
788	788	Shan-Yan Zhang	12	78	45	710	57	788	non-Hubei
409	409	Zhengtong Lv	15	48	57	361	72	409	Hubei
564	564	Zhichao Feng	12	69	33	495	45	564	non-Hubei
172	172	Chen Zhao	15	60	12	112	27	172	Hubei
232	232	Lingshuang Sheng	17	130	8	102	25	232	Hubei
671	671	Yifei Nie	0	72	11	583	11	655	non-Hubei
1168	1168	Sheng-long Chen	23	148	27	1020	50	1168	non-Hubei
456	456	B. Cheng	50	251	20	205	70	456	Hubei
625	625	Songqiao Liu	10	64	30	561	40	625	non-Hubei
333	333	XiaoYu	5	26	23	307	28	333	non-Hubei
1007	1007	Yuan Cen	68	287	51	720	119	1007	Hubei
41	41	Qing Zhang	2	8	1	33	3	41	non-Hubei
56	56	Jing-Bo Wang	1	11	6	45	7	56	non-Hubei
78	78	Nannan Zhang	1	6	10	72	11	78	non-Hubei
108	108	Qingchun Yao	3	25	2	83	5	108	Hubei
293	293	Zixin Shu	22	86	25	207	47	293	Hubei
64	64	Huihuang Huang	3	21	3	43	6	64	non-Hubei
85	85	Chang-Zheng Wang	7	46	3	39	10	85	Hubei
		39						11498

## Sheet: cardiovascular disease
			CARDIOVASCULAR DISEASE		severe		non-severe			final version	CARDIOVASCULAR DISEASE	severe		non-severe		comorbidities	total cases
		6	Dawei Wang		9	26	11	38		4	Cheng Kebin	16	181	12	282	28	463	Hubei
		7	XIAO Kaihu		2	17	3	29		9	Fang Xiaowei	2	24	1	55	3	79	non-Hubei
		9	Jin-jin Zhang		4		3			7	Li dan	2	17	3	63	5	80	non-Hubei
		10	Yuan Jing		0		1			10	Li Kunhua	1	25	0	58	1	83	non-Hubei
											Sun Lijun	1	15	0	40	1	55	non-Hubei
											Xiao Kaihu	2	36	3	107	5	143	non-Hubei
											Yuan Jing	0	31	1	192	1	223	non-Hubei
											Zhang Guqin	13	55	9	166	22	221	Hubei
											Zhang Jin-jin	4	52	3	82	7	140	Hubei
									134	134	Siqin Zhang	1	19	0	115	1	134	non-Hubei
									276	276	Yiping Wei	4	14	8	262	12	276	Hubei
									1280	1280	Huilin Fang	54	487	48	793	102	1280	Hubei
									92	92	Wang Ling	6	21	2	71	8	92	Hubei
									66	66	Yao Chunyong	1	11	3	55	4	66	non-Hubei
									58	58	Lv Yaodong	2	14	0	44	2	58	non-Hubei
									788	788	Shan-Yan Zhang	2	78	9	710	11	788	non-Hubei
									409	409	Zhengtong Lv	9	48	42	361	51	409	Hubei
									564	564	Zhichao Feng	6	69	16	495	22	564	non-Hubei
									172	172	Chen Zhao	10	60	7	112	17	172	Hubei
									232	232	Lingshuang Sheng	16	130	9	102	25	232	Hubei
									671	671	Yifei Nie	8	72	62	583	70	655	non-Hubei
									1168	1168	Sheng-long Chen	17	148	16	1020	33	1168	non-Hubei
									456	456	B. Cheng	37	251	15	205	52	456	Hubei
									333	333	XiaoYu	8	26	16	307	24	333	non-Hubei
									365	365	Yanpei Zhang	2	26	4	339	6	365	non-Hubei
									1007	1007	Yuan Cen	34	287	31	720	65	1007	Hubei
									78	78	Nannan Zhang	0	6	8	72	8	78	non-Hubei
									108	108	Qingchun Yao	2	25	2	83	4	108	Hubei
									293	293	Zixin Shu	11	86	8	207	19	293	Hubei
									85	85	Chang-Zheng Wang	8	46	1	39	9	85	Hubei
											30						10106

## Sheet: COPD
			COPD		severe		non-severe				final version	COPD	severe		non-severe		comorbidities	total cases
		6	Dawei Wang		3	26	1	38				Cheng Kebin	12	181	7	282	19	463	Hubei
		8	Kunhua Li		4	11	1	4				Li dan	2	17	1	63	3	80	non-Hubei
		9	Jin-jin Zhang		2		0					Li Kunhua	4	25	1	58	5	83	non-Hubei
		10	Yuan Jing		1		0					Sun Lijun	3	15	1	40	4	55	non-Hubei
												Xiao Kaihu	1	36	3	107	4	143	non-Hubei
												Yuan Jing	1	31	0	192	1	223	non-Hubei
												Zhang Guqin	4	55	2	166	6	221	Hubei
												Zhang Jin-jin	2	52	0	82	2	140	Hubei
												Zhao Xin-Ying	1	30	0	61	1	91	Hubei
										134	134	Siqin Zhang	1	19	0	115	1	134	non-Hubei
										276	276	Yiping Wei	2	14	5	262	7	276	Hubei
										1280	1280	Huilin Fang	15	487	15	793	30	1280	Hubei
										412	412	Yang Xiuhong	23	301	4	111	27	412	Hubei
										92	92	Wang Ling	3	21	3	71	6	92	Hubei
										66	66	Yao Chunyong	1	11	3	55	4	66	Hubei
										788	788	Shan-Yan Zhang	3	78	0	710	3	788	non-Hubei
										409	409	Zhengtong Lv	4	48	13	361	17	409	Hubei
										564	564	Zhichao Feng	9	69	7	495	16	564	non-Hubei
										172	172	Chen Zhao	2	60	2	112	4	172	Hubei
										232	232	Lingshuang Sheng	7	130	1	102	8	232	Hubei
										671	671	Yifei Nie	2	72	15	583	17	655	non-Hubei
										1168	1168	Sheng-long Chen	6	148	27	1020	33	1168	non-Hubei
										456	456	B. Cheng	14	251	4	205	18	456	Hubei
										333	333	XiaoYu	2	26	3	307	5	333	non-Hubei
										365	365	Yanpei Zhang	0	26	2	339	2	365	non-Hubei
										1007	1007	Yuan Cen	32	287	14	720	46	1007	Hubei
										663	663	Jixiang Zhang	38	409	13	254	51	663	Hubei
										41	41	Qing Zhang	0	8	2	33	2	41	non-Hubei
										56	56	Jing-Bo Wang	2	11	0	45	2	56	non-Hubei
										108	108	Qingchun Yao	0	25	3	83	3	108	Hubei
										85	85	Chang-Zheng Wang	4	46	1	39	5	85	Hubei
												31						10861

## Sheet: maglinancy
					MALIGNANCY		severe		non-severe			final version	MALIGNANCY	severe		non-severe		comorbidities	total cases
				5	XIONG Juan		3	27	8		39	4	Cheng Kebin	6	181	4	282	10	463	Hubei
				6	Dawei Wang		4	26	6		38	5	Fang Xiaowei	0	24	1	55	1	79	non-Hubei
													Li dan	1	17	0	63	1	80	non-Hubei
													Zhang Guqin	4	55	5	166	9	221	Hubei
													Zhao Xin-Ying	2	30	1	61	3	91	Hubei
											134	134	Siqin Zhang	0	19	1	115	1	134	non-Hubei
											276	276	Yiping Wei	2	14	1	262	3	276	Hubei
											1280	1280	Huilin Fang	4	487	9	793	13	1280	Hubei
											103	103	Ren Meixin	3	32	1	71	4	103	non-Hubei
											788	788	Shan-Yan Zhang	3	78	3	710	6	788	non-Hubei
											564	564	Zhichao Feng	1	69	3	495	4	564	non-Hubei
											172	172	Chen Zhao	3	60	4	112	7	172	Hubei
											232	232	Lingshuang Sheng	4	130	2	102	6	232	Hubei
											1168	1168	Sheng-long Chen	3	148	8	1020	11	1168	non-Hubei
											456	456	B. Cheng	10	251	2	205	12	456	Hubei
											365	365	Yanpei Zhang	0	26	2	339	2	365	non-Hubei
											663	663	Jixiang Zhang	11	409	3	254	14	663	non-Hubei
											78	78	Nannan Zhang	0	6	2	72	2	78	non-Hubei
											108	108	Qingchun Yao	2	25	0	83	2	108	Hubei
											64	64	Huihuang Huang	1	21	0	43	1	64	non-Hubei
													20						7385

## Sheet: chronic liver disease
					CHRONIC LIVER DISEASE		severe		non-severe			final version	CHRONIC LIVER DISEASE	severe		non-severe		comorbidities	total cases
				4	FANG Xiaowei		0	16	3	11		4	Cheng Kebin	5	181	17	282	22	463	Hubei
				5	XIONG Juan		1	27	0	39		9	Fang Xiaowei	0	24	3	55	3	79	non-Hubei
				7	XIAO Kaihu		2	17	2	29		7	Li dan	1	17	2	63	3	80	non-Hubei
				9	Jin-jin Zhang		4		4			5	Sun Lijun	2	15	1	40	3	55	non-Hubei
													Xiao Kaihu	2	36	2	107	4	143	non-Hubei
													Yuan Jing	2	31	6	192	8	223	non-Hubei
													Zhang Guqin	4	55	3	166	7	221	Hubei
													Zhang Jin-jin	4	52	4	82	8	140	Hubei
									1280			1280	Huilin Fang	8	487	9	793	17	1280	Hubei
									103			103	Ren Meixin	1	32	5	71	6	103	non-Hubei
									66			66	Yao Chunyong	0	11	3	55	3	66	Hubei
									58			58	Lv Yaodong	1	14	3	44	4	58	non-Hubei
									77			77	Cheng Fang	2	27	6	50	8	77	non-Hubei
									788			788	Shan-Yan Zhang	4	78	27	710	31	788	non-Hubei
									564			564	Zhichao Feng	3	69	6	495	9	564	non-Hubei
									172			172	Chen Zhao	1	60	2	112	3	172	Hubei
									232			232	Lingshuang Sheng	7	130	5	102	12	232	Hubei
									1168			1168	Sheng-long Chen	8	148	31	1020	39	1168	non-Hubei
									365			365	Yanpei Zhang	1	26	8	339	9	365	non-Hubei
									1007			1007	Yuan Cen	1	287	8	720	9	1007	Hubei
									56			56	Jing-Bo Wang	1	11	9	45	10	56	non-Hubei
									108			108	Qingchun Yao	1	25	1	83	2	108	Hubei
									85			85	Chang-Zheng Wang	4	46	2	39	6	85	Hubei
													23						7533

## Sheet: kidney disease
				肾		severe		non-severe			final version	kidney disease	severe		non-severe		comorbidities	total cases
			5	XIONG Juan		1	27	2	39			Cheng Kebin	6	181	7	282	13	463	Hubei
			6	Dawei Wang		2	26	2	38			Fang Xiaowei	1	24	2	55	3	79	non-Hubei
												Li dan	1	17	0	63	1	80	non-Hubei
												Sun Lijun	1	15	0	40	1	55	non-Hubei
												Zhang Guqin	5	55	1	166	6	221	Hubei
												Zhao Xin-Ying	1	30	0	61	1	91	Hubei
											1280	Huilin Fang	16	487	4	793	20	1280	Hubei
											412	Yang Xiuhong	5	301	5	111	10	412	Hubei
											103	Ren Meixin	2	32	1	71	3	103	non-Hubei
											66	Yao Chunyong	1	11	1	55	2	66	Hubei
											788	Shan-Yan Zhang	2	78	5	710	7	788	non-Hubei
											564	Zhichao Feng	2	69	1	495	3	564	non-Hubei
											172	Chen Zhao	2	60	1	112	3	172	Hubei
											232	Lingshuang Sheng	6	130	4	102	10	232	Hubei
											1168	Sheng-long Chen	7	148	4	1020	11	1168	non-Hubei
											456	B. Cheng	17	251	2	205	19	456	Hubei
											365	Yanpei Zhang	0	26	2	339	2	365	non-Hubei
											1007	Yuan Cen	8	287	6	720	14	1007	Hubei
											293	Zixin Shu	4	86	0	207	4	293	Hubei
											64	Huihuang Huang	1	21	0	43	1	64	non-Hubei
											85	Chang-Zheng Wang	3	46	1	39	4	85	Hubei
												21						8044

## Sheet: cerebrovascular disease 
												final version
				脑血管		severe		non-severe				cerebrovascular diseases	severe		non-severe		comorbidities	total cases
			5	XIONG Juan		2	27	4	39		4	Cheng Kebin	8	181	6	282	14	463	Hubei
			6	Dawei Wang		6	26	1	38		5	Fang Xiaowei	3	24	0	55	3	79	non-Hubei
												Zhang Guqin	11	55	4	166	15	221	Hubei
										276	276	Yiping Wei	1	14	5	262	6	276	Hubei
										1280	1280	Huilin Fang	7	487	6	793	13	1280	Hubei
										66	66	Yao Chunyong	1	11	1	55	2	66	Hubei
										58	58	Lv Yaodong	2	14	0	44	2	58	non-Hubei
										564	564	Zhichao Feng	0	69	5	495	5	564	non-Hubei
										172	172	Chen Zhao	4	60	1	112	5	172	Hubei
										1168	1168	Sheng-long Chen	4	148	6	1020	10	1168	non-Hubei
										625	625	Songqiao Liu	2	64	8	561	10	625	non-Hubei
										365	365	Yanpei Zhang	1	26	2	339	3	365	non-Hubei
										1007	1007	Yuan Cen	14	287	11	720	25	1007	Hubei
										78	78	Nannan Zhang	0	6	3	72	3	78	non-Hubei
										293	293	Zixin Shu	9	86	2	207	11	293	Hubei
										64	64	Huihuang Huang	1	21	0	43	1	64	non-Hubei
												16						6779

[truncated: 3 more sheets: u-test, immunosupressive disease, digestive disease]
